# Supplementary material for: Reductive CO2 fixation by the N-formylation reaction over supported Pt nanoparticle catalysts modified with basic polyoxometalates
Source: Royal Society of Chemistry journal article supplement (doi:10.1039/d4cy01513d), 2025-01-01
Supplement: d4cy01513d1.pdf [file d4cy01513d1.pdf]

Supplementary Information

**Reductive CO<sub>2</sub> Fixation by *N*-Formylation Reaction over  
Supported Pt Nanoparticle Catalyst Modified with Basic  
Polyoxometalates**

*Soichi KIKKAWA,<sup>a\*</sup> Yutaro MATSUNAGA,<sup>a</sup> Shoji FUKUDA,<sup>a</sup> and Seiji YAMAZOE<sup>a\*</sup>*

## Chemicals

$\gamma$ -Al<sub>2</sub>O<sub>3</sub> (JRC-ALO-7), ZrO<sub>2</sub> (JRC-ZRO-6), Nb<sub>2</sub>O<sub>5</sub> (JRC-NBO-2), and TiO<sub>2</sub> (JRC-TIO-17) were supplied from the Catalyst Society of Japan. Aqueous solution of Pt[(NH<sub>3</sub>)<sub>2</sub>(NO<sub>2</sub>)<sub>2</sub>] was purchased from Furuya Metal Co. Ltd. K<sub>8</sub>Nb<sub>6</sub>O<sub>19</sub>·14H<sub>2</sub>O and K<sub>8</sub>Ta<sub>6</sub>O<sub>19</sub>·16H<sub>2</sub>O were purchased from Mitsuwa Chemical Co. Ltd. Methanol (MeOH), dodecane, piperidine, piperazine, methylpiperazine, morpholine, 1,2,3,4-tetrahydroisoquinoline, nitrophenol, 1-formylpiperidine, dimethylamine, and toluene were purchased from Tokyo Chemical Industry Co. Ltd. Potassium carbonate, nitric acid, and hydrogen fluoride were purchased from Kanto Chemical Co. Inc. All reagents were used as received.

## Synthesis of POM-modified supported Pt NP catalyst

Supported Pt catalysts (Pt/Al<sub>2</sub>O<sub>3</sub>) were prepared by a typical impregnation method, in accordance with a previous report.<sup>[13]</sup> Al<sub>2</sub>O<sub>3</sub> was dispersed in an aqueous solution of Pt[(NH<sub>3</sub>)<sub>2</sub>(NO<sub>2</sub>)<sub>2</sub>] (equivalent to 5.0wt<sub>Pt</sub>%) and then evaporated at 80°C. The resulting sample was calcined in air at 673 K for 5 h and then reduced in 5% H<sub>2</sub> (100 mL/min) at 673 K for 2 h to obtain Al<sub>2</sub>O<sub>3</sub>-loaded Pt NPs (Pt/Al<sub>2</sub>O<sub>3</sub>). [M<sub>6</sub>O<sub>19</sub>]<sup>8-</sup>-modified Pt/Al<sub>2</sub>O<sub>3</sub> (M = Nb, Ta, M6-Pt/Al<sub>2</sub>O<sub>3</sub>) was prepared by an adsorption method. Pt/Al<sub>2</sub>O<sub>3</sub> (600 mg) was dispersed in 100 mL of 61.5 mM K<sub>8</sub>Nb<sub>6</sub>O<sub>19</sub> and K<sub>8</sub>Ta<sub>6</sub>O<sub>19</sub> aqueous solutions (POM/Pt atomic ratio = 4:1) under a N<sub>2</sub> atmosphere, followed by suction filtration and drying. The amount of modifying [Nb<sub>6</sub>O<sub>19</sub>]<sup>8-</sup> was controlled by the concentration of K<sub>8</sub>Nb<sub>6</sub>O<sub>19</sub> aq. for the absorption treatment ([Nb<sub>6</sub>O<sub>19</sub>]<sup>8-</sup>/Pt atom = 0.006–4). The samples were referred to using the POM/Pt atomic ratio during the absorption process as **XM6-Pt/Al<sub>2</sub>O<sub>3</sub>** (M = Nb, Ta). ZrO<sub>2</sub>, Nb<sub>2</sub>O<sub>5</sub>, and TiO<sub>2</sub> were also used as support in the same manner.

## Catalytic reaction

The *N*-formylation of amines using CO<sub>2</sub> as a carbon source was carried out in an autoclave. Typical reaction conditions for the *N*-formylation of piperidine are as follows: piperidine, 0.1 mmol; methanol, 2 mL; catalyst, 19.5 mg (Pt; equivalent to 5.0  $\mu$ mol); internal standard, dodecane; CO<sub>2</sub>, 1.0 MPa; H<sub>2</sub>, 2.0 MPa; reaction temperature, 130°C; and reaction time, 72 h. For the blank tests, Nb<sub>2</sub>O<sub>5</sub> (1.8 mg), NH<sub>4</sub>Cl (6.2  $\mu$ mol), Cs<sub>2</sub>CO<sub>3</sub> (0.31  $\mu$ mol), and 0.1 mL of 3.1 mM K<sub>8</sub>Nb<sub>6</sub>O<sub>19</sub> aq. (0.31  $\mu$ mol) were added as additives to **Pt/Al<sub>2</sub>O<sub>3</sub>**. As for *P*<sub>CO<sub>2</sub></sub> and *P*<sub>H<sub>2</sub></sub> dependence, *P*<sub>CO<sub>2</sub></sub> and *P*<sub>H<sub>2</sub></sub> were varied in the ranges of 0.1–1.0 and 0.1–2.0, respectively. To confirm the applicability of *N*-formylation reactions, piperazine, methylpiperazine, morpholine, and 1,2,3,4-tetrahydroisoquinoline were used as amines. As for the *N*-formylation of morpholine, 2 mL of DMF was used as a solvent.

The products were quantified using a gas chromatograph equipped with a flame ionization detector (GC-2014; Shimadzu Co. Ltd.). The conversion and yield were calculated as follows:

$$\text{Conversion (\%)} = \left( 1 - \frac{\text{Area}_{\text{Sub.}}}{\text{Area}_{\text{IS}}} \times \frac{\text{Area}_{\text{IS},0}}{\text{Area}_{\text{Sub},0}} \right) \times 100$$
$$\text{Yield (\%)} = \frac{\text{Area}_{\text{Pro.}}}{\text{Area}_{\text{IS}}} \times \frac{\text{ECN}_{\text{Sub.}}}{\text{ECN}_{\text{Pro.}}} \times \frac{\text{Area}_{\text{IS},0}}{\text{Area}_{\text{Sub},0}} \times 100$$

where Sub. stands for amine substrate; IS, internal standard (dodecane); Pro., product; and ECN, effective carbon number. Subscript 0 indicates the peak area reaction solution without catalyst.

## Characterization

The loading amounts of Pt NPs, and  $[\text{Nb}_6\text{O}_{19}]^{8-}$  and  $[\text{Ta}_6\text{O}_{19}]^{8-}$  clusters were determined by inductively coupled plasma atomic emission spectroscopy (ICP-OES, iCAP 6200; Thermo Fisher Scientific). The catalysts were dissolved in a mixed solution of  $\text{HNO}_3$  and  $\text{HF}$  at a volume ratio of 4:1 by heating at 363 K.

The size distribution of Pt NPs was observed using a high-angle annular dark field scanning transmission electron microscope (HAADF-STEM, ARM-200F NEOARM; JEOL) operated at 200 kV. The fluorescent X-rays of Nb K- and Pt L-edges for Nb6-Pt/ $\text{Al}_2\text{O}_3$  and Ta M- and Pt L- and M-edges for Ta6-Pt/ $\text{Al}_2\text{O}_3$  were used for line analysis of STEM images using an energy-dispersive X-ray (EDX) analyzer.

X-ray absorption spectroscopy was carried out on the BL01B1 beamline at SPring-8 (Japan Synchrotron Radiation Research Institute). Nb K-, and Pt and Ta  $\text{L}_{3-}$ edges X-ray absorption fine structure (XAFS) spectra were collected using a double-crystal  $\text{Si}(311)$  or  $\text{Si}(111)$  monochromator, respectively, while rejecting the higher harmonic X-rays using a Rh-coated mirror. The incident and transmitted X-ray fluxes were measured using ionization chambers. Data reduction was performed using xTunes software.<sup>[14]</sup>

The base property of  $[\text{Nb}_6\text{O}_{19}]^{8-}$ -modified Pt NPs was confirmed by the coloration of *p*-nitrophenol. The catalyst powders were dispersed in a MeOH solution of *p*-nitrophenol and the filtrate was measured using a UV-vis spectrometer (V-700; JASCO). In the presence of base, the solution turned to yellow by the formation of phenoxide ions.

CO pulse titration was carried out to determine the Pt dispersion (BELCAT-II; Microtrac MRB Co. Ltd.). As a pretreatment, the catalyst was oxidized at 623 K under 100%  $\text{O}_2$  and then reduced at 623 K under 2%  $\text{H}_2/\text{Ar}$ . The amount of Pt atoms exposed at the surface per gram of catalyst was determined using CO pulse titration at 323 K, assuming a chemisorption stoichiometry of  $\text{CO}:\text{Pt} = 1$ .

The surface electronic state of Pt NPs was evaluated by diffuse reflectance Fourier-transform infrared spectroscopy (IR-DRIFTS) using CO as a probe. The measurement was performed using an infrared spectrometer (FT/IR-4700; JASCO) equipped with a mercury cadmium tungsten detector. The spectra were collected with the integration of 128 scans with a resolution of  $4\text{ cm}^{-1}$ . As a pretreatment, the catalyst was oxidized at 623 K under 100%  $\text{O}_2$  and then reduced at 623 K under 2%  $\text{H}_2/\text{Ar}$ . The difference spectrum was obtained by a subtraction of sample spectra w/o CO adsorption from that under 5%  $\text{CO}/\text{He}$ .

**Table S1.** Comparison of the catalytic activity in this work with the reported catalytic systems

| Catalyst                                                                            | Metal<br>(Loading<br>( $\mu\text{mol}$ )) | Additive                                        | Substrate<br>(mmol)   | Reaction<br>temperat<br>ure (K) | Reaction<br>time (h) | Yield<br>(%) | TOF<br>( $\text{h}^{-1}$ ) | Ref.         |
|-------------------------------------------------------------------------------------|-------------------------------------------|-------------------------------------------------|-----------------------|---------------------------------|----------------------|--------------|----------------------------|--------------|
| Nb6-<br>4.0Pt/Al <sub>2</sub> O <sub>3</sub>                                        | Pt<br>(5)                                 | None                                            | Piperidine<br>(0.1)   | 403                             | 72                   | 84           | 0.24                       | This<br>work |
| –                                                                                   | –                                         | None                                            | Morpholine<br>(0.1)   | 403                             | 72                   | 71           | 0.20                       | This<br>work |
| K-<br>Pt(Nb <sub>6</sub> O <sub>19</sub> ) <sub>2</sub> ] <sup>12–</sup>            | Pt<br>(20)                                | None                                            | Piperidine<br>(1.0)   | 403                             | 36                   | 71           | 0.99                       | Ref.<br>[7]  |
| –                                                                                   | –                                         | None                                            | Morpholine<br>(0.5)   | 403                             | 48                   | 83           | 0.43                       | Ref.<br>[7]  |
| Cu(OCOCH <sub>3</sub> ) <sub>2</sub>                                                | Cu<br>(100)                               | 4-Dimethyl<br>aminopyridine                     | Morpholine<br>(1.0)   | 363                             | 12                   | >99          | 0.83                       | Ref.<br>[10] |
| (Methyltrioctyla<br>mmonium) <sub>6</sub> -<br>SiW <sub>11</sub> O <sub>39</sub> Ru | Ru<br>(5.0)                               | 1-Butyl-3-<br>methyl-<br>imidazolium<br>acetate | Morpholine<br>(1.0)   | 393                             | 12                   | 97           | 16                         | Ref.<br>[14] |
| Co <sub>3</sub> O <sub>4</sub>                                                      | Co (85)                                   | ZnCl <sub>2</sub>                               | Isoquinoline<br>(0.5) | 443                             | 16                   | 97           | 0.36                       | Ref.<br>[9]  |
| Cu <sub>0</sub> /CuAlO <sub>x</sub><br>(Cu 7.5wt%)                                  | Cu (118)                                  | None                                            | Morpholine<br>(1.0)   | 423                             | 24                   | >99          | 0.35                       | Ref.<br>[16] |
| Pd/C<br>(Pd: 1wt%)                                                                  | Pd<br>(4.7)                               | KOH                                             | Piperidine<br>(1.0)   | 378                             | 5                    | 51           | 22                         | Ref.<br>[17] |
| Au/TiO <sub>2</sub><br>(Au: 2.2wt%)                                                 | Au<br>(10)                                | Dimethylamine                                   | Morpholine<br>(0.5)   | 398                             | 5                    | >99          | 4.4                        | Ref.<br>[18] |
| Au/Nb <sub>2</sub> O <sub>5</sub><br>(Au: 1wt%)                                     | Au<br>(10)                                | N,N-Dimethyl<br>acetamide                       | Morpholine<br>(0.5)   | 398                             | 5                    | 69           | 6.9                        | Ref.<br>[19] |
| Ir/nanodiamond<br>@graphite<br>(Ir: 0.03wt%)                                        | Ir<br>(0.049)                             | None                                            | Morpholine<br>(735)   | 423                             | 23                   | 46           | 3.1<br>$\times 10^5$       | Ref.<br>[13] |

**Table S2.** Solvent effect on *N*-formylation reaction of piperidine using CO<sub>2</sub> over 4.0Nb6-Pt/Al<sub>2</sub>O<sub>3</sub><sup>a</sup>.

| Entry | Solvent       | Yield<br>(%) | CO production <sup>b</sup><br>(mmol) |
|-------|---------------|--------------|--------------------------------------|
| 1     | MeOH          | 43           | 91.4                                 |
| 2     | Dimethylamine | 75           | 29.6                                 |
| 3     | Toluene       | 84           | 13.7                                 |

<sup>a</sup>Amines, 0.1 mmol; solvent, 2 mL; catalyst, 19.5 mg; internal standard, dodecane; CO<sub>2</sub>, 1.0 MPa; H<sub>2</sub>, 2.0 MPa; reaction temperature, 130°C; reaction time, 72 h.

<sup>b</sup>Produced amount of CO was calculated from the concentration of CO after the reaction, initial total pressure (3.0 MPa), and volume of reaction vessel (40 mL).

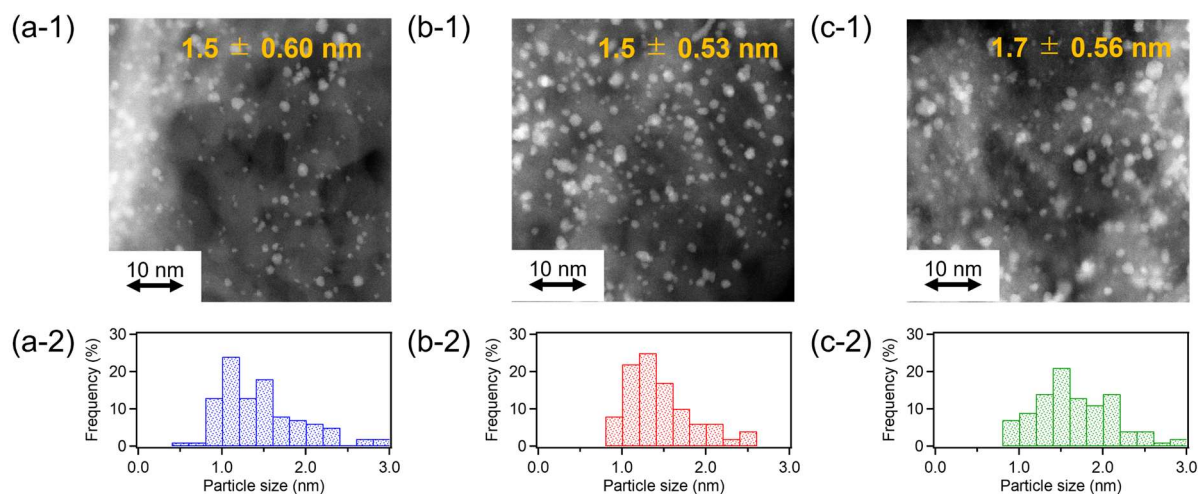

**Figure S1.** HAADF-STEM images of (a-1) **Pt/Al<sub>2</sub>O<sub>3</sub>**, (b-1) **4.0Nb6- Pt/Al<sub>2</sub>O<sub>3</sub>**, (c-1) **4.0Ta6- Pt/Al<sub>2</sub>O<sub>3</sub>**, and the corresponding particle size distributions (a-2), (b-2), and (c-2), respectively.

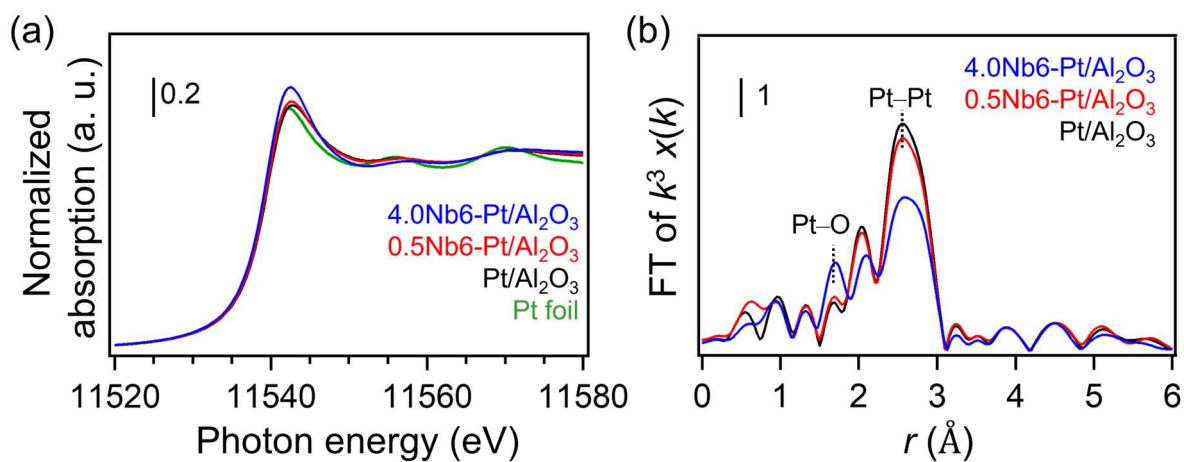

**Figure S2.** (a) Pt L<sub>3</sub>-edge XANES spectra of **4.0Nb6-Pt/Al<sub>2</sub>O<sub>3</sub>** (blue), **0.5Nb6-Pt/Al<sub>2</sub>O<sub>3</sub>** (red), **Pt/Al<sub>2</sub>O<sub>3</sub>** (black), and Pt foil (green). (b) FT of Pt L<sub>3</sub>-edge EXAFS spectra of **4.0Nb6-Pt/Al<sub>2</sub>O<sub>3</sub>** (blue), **0.5Nb6-Pt/Al<sub>2</sub>O<sub>3</sub>** (red), and **Pt/Al<sub>2</sub>O<sub>3</sub>** (black).

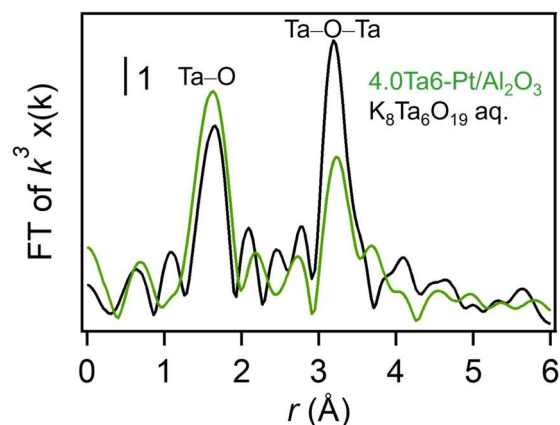

**Figure S3.** FT of Ta L<sub>3</sub>-edge EXAFS spectra of **4.0Ta6-Pt/Al<sub>2</sub>O<sub>3</sub>** (green) and K<sub>8</sub>Ta<sub>6</sub>O<sub>19</sub> aqueous solution (black).

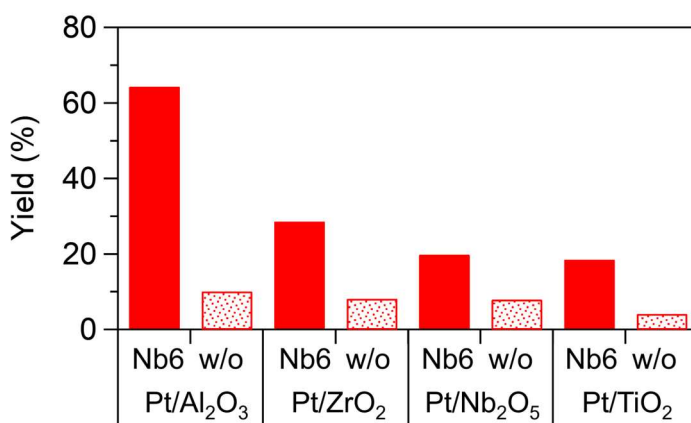

**Figure S4.** Product yield in *N*-formylation reaction of piperidine over supported Pt NP catalysts with various supports. The loading weight of Pt was 5wt%. The dispersions of Pt NPs measured by CO pulse titration were 58% for **Pt/Al<sub>2</sub>O<sub>3</sub>**, 35% for **Pt/ZrO<sub>2</sub>**, 2.5% for **Pt/Nb<sub>2</sub>O<sub>5</sub>**, and 12% for **Pt/TiO<sub>2</sub>**. It should be noted that the SMSI effect resulted in inaccurate estimation of the dispersion of Pt NPs on TiO<sub>2</sub>. ICP measurements revealed that the amounts of modified [Nb<sub>6</sub>O<sub>19</sub>]<sup>8-</sup> were 0.89wt% for **4.0Nb6-Pt/Al<sub>2</sub>O<sub>3</sub>**, 1.63% for **4.0Nb6-Pt/ZrO<sub>2</sub>**, and 1.08wt% for **4.0Nb6-Pt/TiO<sub>2</sub>**. Considering the dispersion of Pt NPs, [Nb<sub>6</sub>O<sub>19</sub>]<sup>8-</sup> were modified on the surface of ZrO<sub>2</sub> and TiO<sub>2</sub> supports.

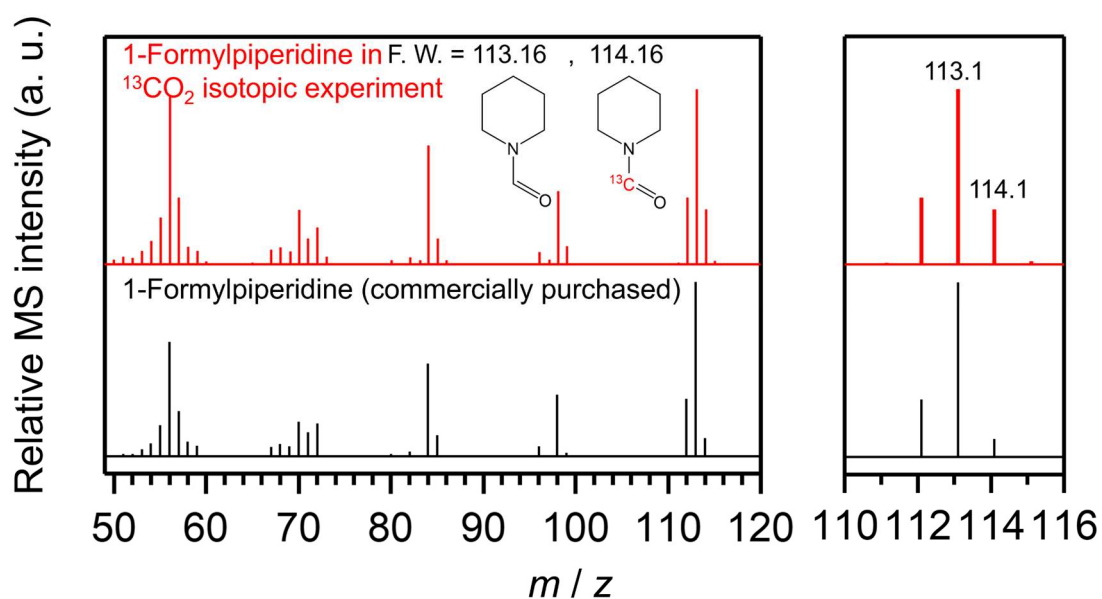

**Figure S5.** MS profile of peak derived from piperidine in the isotopic experiment using 0.1 MPa of  $^{13}\text{CO}_2$  with 1.9 MPa of  $^{12}\text{CO}_2$  and 1.0 MPa of  $\text{H}_2$ .

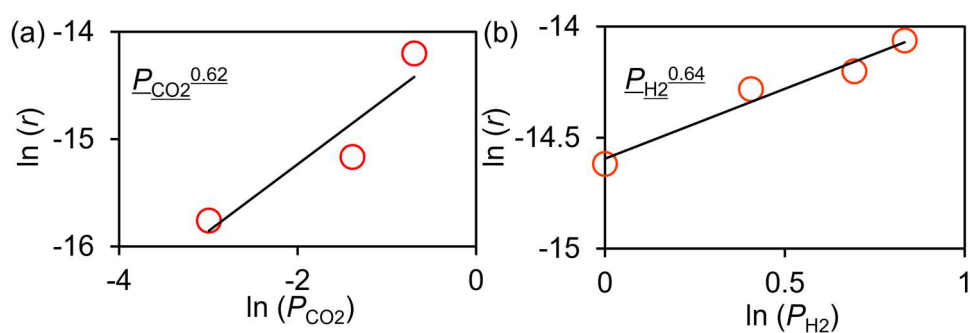

**Figure S6.** Partial pressure dependence on (a)  $P_{\text{CO}_2}$  and (b)  $P_{\text{H}_2}$  for *N*-formylation reaction of piperidine using  $\text{CO}_2$  with **4.0Nb6-Pt/Al<sub>2</sub>O<sub>3</sub>**. Reaction conditions: piperidine, 0.1 mmol; methanol, 2 mL; catalyst, 19.5 mg; internal standard, dodecane;  $\text{CO}_2$ , 0.1–1.0 MPa;  $\text{H}_2$ , 0.1–2.0 MPa; reaction temperature, 130°C; reaction time, 72 h.
